# Supplementary material for: Disinhibition-assisted long-term potentiation in the prefrontal-amygdala pathway via suppression of somatostatin-expressing interneurons
Source: PubMed Central journal article supplement (PMC7019182; doi:10.1117/1.nph.7.1.015007), 2020-02-14
Supplement: NPh_007_015007_SD002.pdf [file NPh_007_015007_SD002.pdf]

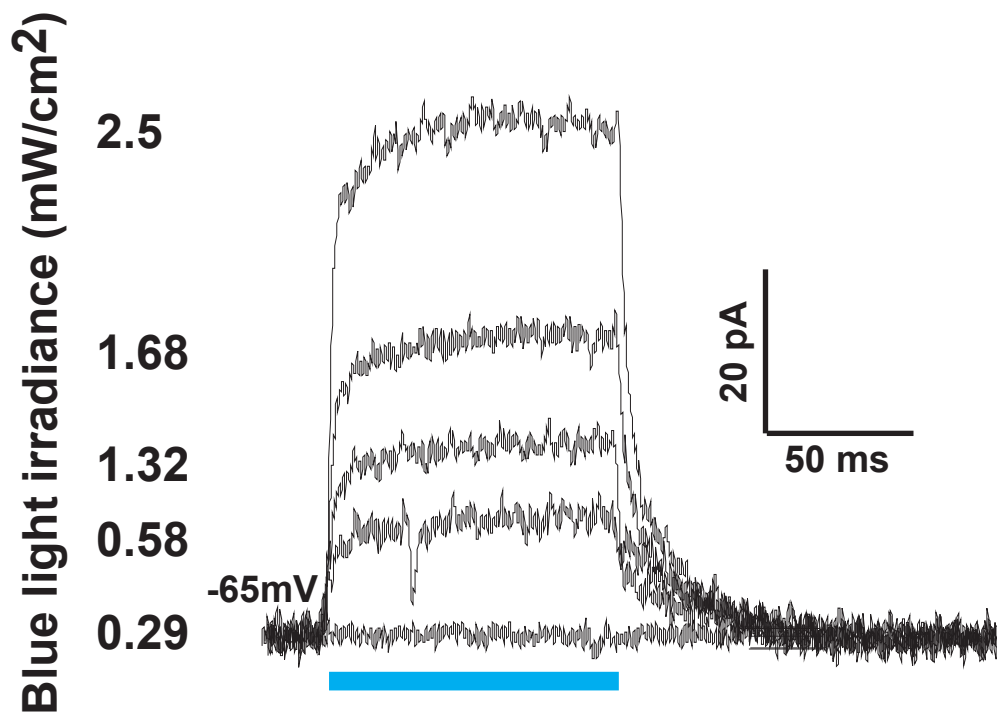

**Fig. S2 Blue light elicits hyperpolarizing current in an Sst-IN expressing Arch.** An example of the whole-cell recording from a BLA Sst-INs with Arch. The responses to 100 ms pulses of blues light of the indicated irradiance are shown.
