# Supplementary material for: Disinhibition-assisted long-term potentiation in the prefrontal-amygdala pathway via suppression of somatostatin-expressing interneurons
Source: PubMed Central journal article supplement (PMC7019182; doi:10.1117/1.nph.7.1.015007), 2020-02-14
Supplement: NPh_007_015007_SD003.pdf [file NPh_007_015007_SD003.pdf]

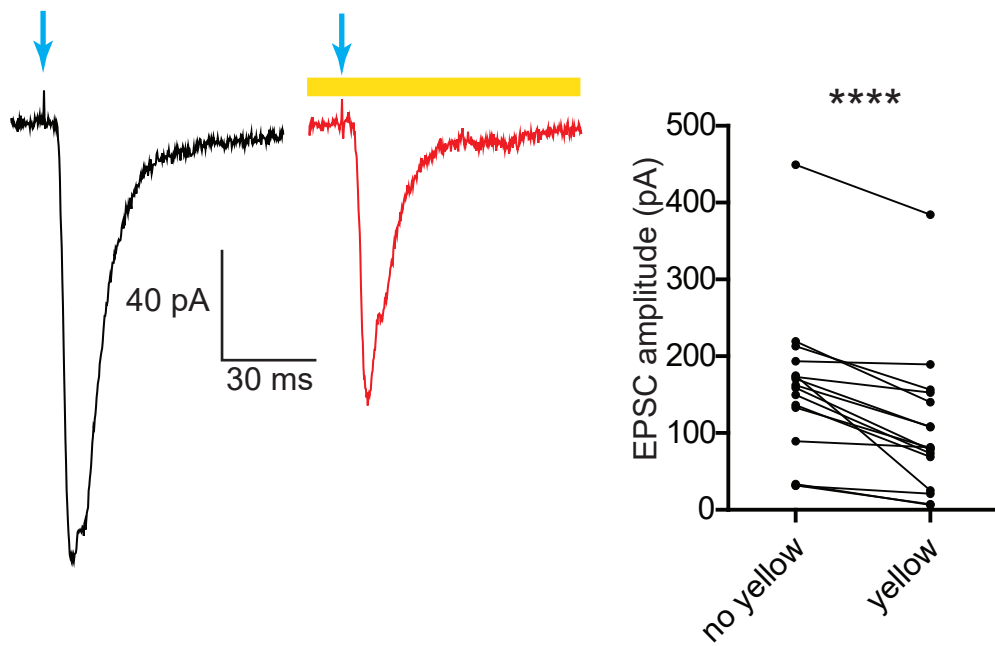

**Fig. S3 Yellow light inhibits synaptic transmission induced via Chronos.** Left: An example of EPSCs evoked in a BLA neuron by blue-light stimulation (blue arrows) of dmPFC axons expressing Chronos in the absence (black) and presence (red) of continuous yellow light at the irradiance of 0.24 mW/cm<sup>2</sup>. The traces shown represent averages of 5 sweeps. The sweeps in the absence and presence of yellow light were recorded in alternating order. Right: Summary of recordings from 16 BLA neurons in 5 slices from 2 mice. \*\*\*\* $p < 0.0001$ , paired t-test.
